# Supplementary material
Source: Springer Nature journal article supplement (https://www.springermedizin.de/resource/supplementary/13256_2014_2909_MOESM1_ESM.pdf/9650806)

**A**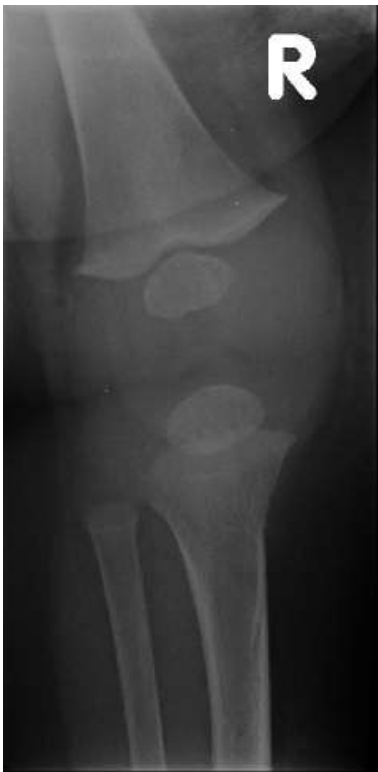**B**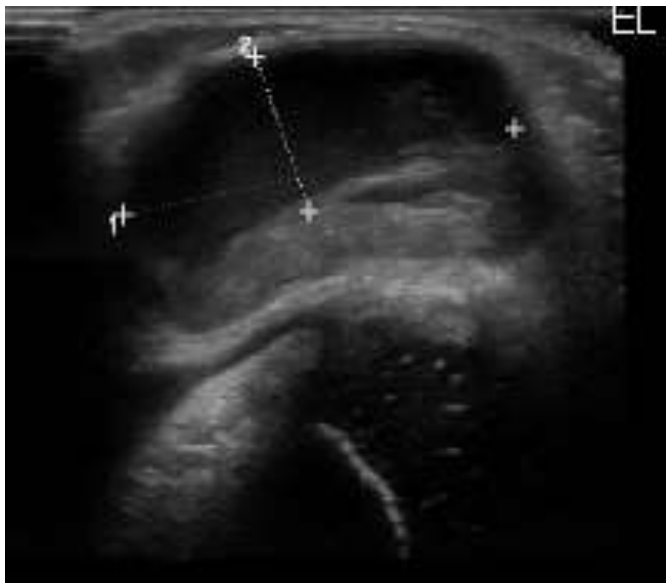

Supplement: MOESM1 [file 9650806]
